# Supplementary material for: Predicting the Crystal Structure and Lattice Parameters of the Perovskite Materials via Different Machine Learning Models Based on Basic Atom Properties
Source: MDPI journal article supplement (doi:10.3390/cryst12111570), 2022-11-03
Supplement: s1 [file s1]

Archive with 1 entries (1 files):
- crystals-1891401-supplementary-update.pdf
